# Supplementary material
Source: publisher figshare collection journal article supplement (https://gsapubs.figshare.com/ndownloader/files/23292479)

Supplemental Table DR1. Characteristics of field sites averaged over reaches 100 m long

| Stream segment | DA (km <sup>2</sup> ) | E (m) | S (m/m) | Bf w/d | w <sub>c</sub> /w <sub>v</sub> | length/width (m/m) | diameter/depth (m/m) | Wood <sub>vol</sub> (m <sup>3</sup> /100m) | Wood D50 (cm) | Wood Dmax (cm) | DR spacing (m) | Substrate categories |     |     |     |     |
|----------------|-----------------------|-------|---------|--------|--------------------------------|--------------------|----------------------|--------------------------------------------|---------------|----------------|----------------|----------------------|-----|-----|-----|-----|
|                |                       |       |         |        |                                |                    |                      |                                            |               |                |                | lb                   | mb  | sb  | c   | s   |
| NSV S1         | 15.6                  | 3040  | 0.079   | 10.8   | 0.6                            | 0.29               | 0.22                 | 6.46                                       | 23            | 47             | 4.3            | 28                   | 24  | 22  | 23  | 3   |
| NSV S2         | 18.8                  | 2960  | 0.092   | 6.4    | 0.5                            | 0.30               | 0.15                 | 3.79                                       | 20            | 36             | 8.0            | 30                   | 25  | 25  | 15  | 5   |
| NSV S3         | 20.5                  | 2900  | 0.085   | 9.6    | 0.6                            | 0.27               | 0.20                 | 4.86                                       | 24            | 38             | 7.6            | 23                   | 27  | 24  | 22  | 5   |
| NSV S4         | 12.8                  | 3100  | 0.101   | 7.5    | 0.8                            | 0.26               | 0.20                 | 5.35                                       | 20            | 45             | 5.5            | 37                   | 22  | 24  | 16  | 3   |
| average        |                       |       | 0.089   | 8.6    | 0.6                            | 0.28               | 0.19                 | 5.12                                       | 22            | 42             | 6.4            | 29                   | 24  | 24  | 19  | 4   |
| NSV M1         | 16.0                  | 3020  | 0.039   | 17.3   | 0.2                            | 0.24               | 0.33                 | 16.48                                      | 22            | 54             | 3.0            | 0                    | 11  | 19  | 44  | 26  |
| NSV M2         | 19.5                  | 2910  | 0.031   | 15.2   | 0.1                            | 0.33               | 0.33                 | 18.31                                      | 22            | 54             | 3.6            | 0                    | 4   | 4   | 82  | 10  |
| NSV M3         | 17.0                  | 3030  | 0.034   | 16.8   | 0.2                            | 0.39               | 0.38                 | 17.65                                      | 23            | 60             | 2.8            | 0                    | 9   | 10  | 69  | 15  |
| NSV M4         | 14.2                  | 3050  | 0.037   | 15.8   | 0.2                            | 0.41               | 0.34                 | 17.32                                      | 24            | 48             | 3.7            | 0                    | 7   | 14  | 56  | 23  |
| average        |                       |       | 0.035   | 16.2   | 0.2                            | 0.34               | 0.34                 | 17.4                                       | 22            | 54             | 3.3            | 0                    | 8   | 12  | 63  | 18  |
| NFJW S1        | 8.7                   | 2950  | 0.035   | 8.6    | 0.3                            | 0.23               | 0.24                 | 5.66                                       | 12            | 48             | 8.6            | 0                    | 18  | 40  | 35  | 5   |
| NFJW S2        | 8.5                   | 2955  | 0.038   | 8.3    | 0.2                            | 0.32               | 0.21                 | 4.85                                       | 15            | 42             | 5.5            | 3                    | 12  | 35  | 45  | 8   |
| NFJW S3        | 8.3                   | 2960  | 0.045   | 10.8   | 0.2                            | 0.28               | 0.26                 | 4.17                                       | 16            | 34             | 5.0            | 2                    | 13  | 33  | 50  | 4   |
| NFJW S4        | 8.1                   | 2965  | 0.037   | 9.0    | 0.3                            | 0.31               | 0.23                 | 4.90                                       | 15            | 36             | 6.2            | 5                    | 15  | 32  | 38  | 10  |
| average        |                       |       | 0.039   | 9.2    | 0.2                            | 0.28               | 0.24                 | 4.90                                       | 14            | 40             | 6.4            | 2                    | 14  | 35  | 42  | 7   |
| Ouzel S1       | 7.1                   | 3100  | 0.105   | 10.0   | 0.7                            | 0.40               | 0.30                 | 3.92                                       | 18            | 36             | 7.2            | ---                  | --- | --- | --- | --- |
| Ouzel M1       | 7.7                   | 3042  | 0.021   | 23.8   | 0.1                            | 0.33               | 0.70                 | 17.15                                      | 28            | 53             | 3.4            | ---                  | --- | --- | --- | --- |
| Cony S1        | 10.4                  | 3040  | 0.073   | 8.6    | 0.6                            | 0.29               | 0.34                 | 7.59                                       | 24            | 50             | 4.8            | ---                  | --- | --- | --- | --- |
| Cony M1        | 10.3                  | 3052  | 0.039   | 25.5   | 0.2                            | 0.37               | 0.60                 | 19.86                                      | 24            | 56             | 2.9            | ---                  | --- | --- | --- | --- |

NSV S1 indicates North St. Vrain Creek single-thread 1; NSV M1 is North St. Vrain Creek multi-thread 1; NFJW S1 is North Fork Joe Wright Creek single-thread 1; DA is drainage area; E is elevation; S is channel gradient; Bf w/d is bankfull width/depth ratio; w<sub>c</sub>/w<sub>v</sub> is the ratio of bankfull channel width (m) to valley-bottom width (m), using the width of the primary channel in the multi-thread segments; length/width is (average length of wood within bankfull channel/bankfull channel width); diameter/depth is (average log diameter/bankfull flow depth); Wood<sub>vol</sub> is m<sup>3</sup> of wood within the bankfull channel per 100 m of stream; wood D50 is the diameter for which 50% of the measured wood pieces have smaller diameters; wood Dmax is the largest wood diameter measured; DR (debris roughness) spacing is the average downstream spacing of ramps and bridges along the stream segment; substrate categories are large boulder (lb, > 750 mm), medium boulder (mb, 500-750 mm), small boulder (sb, 256-500 mm), cobble (c, 64-256 mm), and sand and finer (s, < 64 mm), each given in percentage. Gray shading indicates average values for each type of channel. Substrate categories were not measured for the Ouzel and Cony Creek sites.

Supplemental Table DR2. Additional characteristics of field sites averaged over reaches 100 m long

| Stream segment | N latitude | W longitude | BA (m <sup>2</sup> /ha) | Bf width (m) | Bf depth (m) | Fp Wood <sub>vol</sub> (m <sup>3</sup> /100m) |
|----------------|------------|-------------|-------------------------|--------------|--------------|-----------------------------------------------|
| NSV S1         | 40 12 38.1 | 105 37 58.6 | 40                      | 10.8         | 1.0          | 0.50                                          |
| NSV S2         | 40 12 31.4 | 105 37 13.8 | 39                      | 8.3          | 1.3          | 0.00                                          |
| NSV S3         | 40 12 15.0 | 105 36 20.1 | 38                      | 11.5         | 1.2          | 0.38                                          |
| NSV S4         | 40 12 48.7 | 105 38 10.3 | 42                      | 7.5          | 1.0          | 0.09                                          |
| average        |            |             | 40                      | 9.5          | 1.1          | 0.24                                          |
| NSV M1         | 40 12 37.0 | 105 37 48.0 | 48                      | 12.1         | 0.7          | 9.20                                          |
| NSV M2         | 40 12 23.6 | 105 36 54.3 | 46                      | 10.6         | 0.7          | 15.34                                         |
| NSV M3         | 40 12 35.9 | 105 37 23.1 | 50                      | 10.1         | 0.6          | 12.68                                         |
| NSV M4         | 40 12 44.7 | 105 38 08.1 | 45                      | 11.1         | 0.7          | 10.15                                         |
| average        |            |             | 47                      | 11.0         | 0.7          | 11.84                                         |
| NFJW S1        | 40 34 18.7 | 105 51 54.5 | 26                      | 6.0          | 0.6          | 0.67                                          |
| NFJW S2        | 40 34 17.0 | 105 51 59.0 | 27                      | 5.0          | 0.4          | 0.84                                          |
| NFJW S3        | 40 34 10.0 | 105 52 04.0 | 24                      | 6.5          | 0.5          | 0.36                                          |
| NFJW S4        | 40 34 06.0 | 105 52 25.0 | 21                      | 5.5          | 0.4          | 0.42                                          |
| average        |            |             | 24                      | 5.8          | 0.5          | 0.57                                          |
| Ouzel S1       | 40 11 45.0 | 105 38 08.0 | 30                      | 6.0          | 0.6          | 0.24                                          |
| Ouzel M1       | 40 11 53.0 | 105 37 57.0 | 42                      | 9.5          | 0.4          | 10.63                                         |
| Cony S1        | 40 10 43.0 | 105 36 05.0 | 43                      | 6.0          | 0.7          | 0.32                                          |
| Cony M1        | 40 10 38.0 | 105 36 11.0 | 46                      | 10.2         | 0.4          | 6.47                                          |

NSV S1 indicates North St. Vrain Creek single-thread 1; NSV M1 is North St. Vrain Creek multi-thread 1; NFJW S1 is North Fork Joe Wright Creek single-thread 1; North latitude in degrees, minutes, seconds; West longitude; BA is basal area, a measure of stand density in forest adjacent to stream; Bf width is bankfull channel width of the main channel (not including secondary channels and islands); Bf depth is average bankfull depth; Fp Wood<sub>vol</sub> is m<sup>3</sup> of wood on the floodplain and in secondary channels per 100 m length (excluding main channel). Gray shading indicates average values for each type of channel.

Figure DR1. Box plot of (A) channel bed gradient (B) the ratio of bankfull channel width to valley-bottom width, (C) basal area of riparian forest, and (D) mean wood piece diameter (D50) for each channel type. The horizontal line within each box indicates the median value, which is also listed beneath the box. Box ends are the 25<sup>th</sup> and 75<sup>th</sup> percentiles. Significant pairwise differences in means are indicated with contrasting letters above each box.

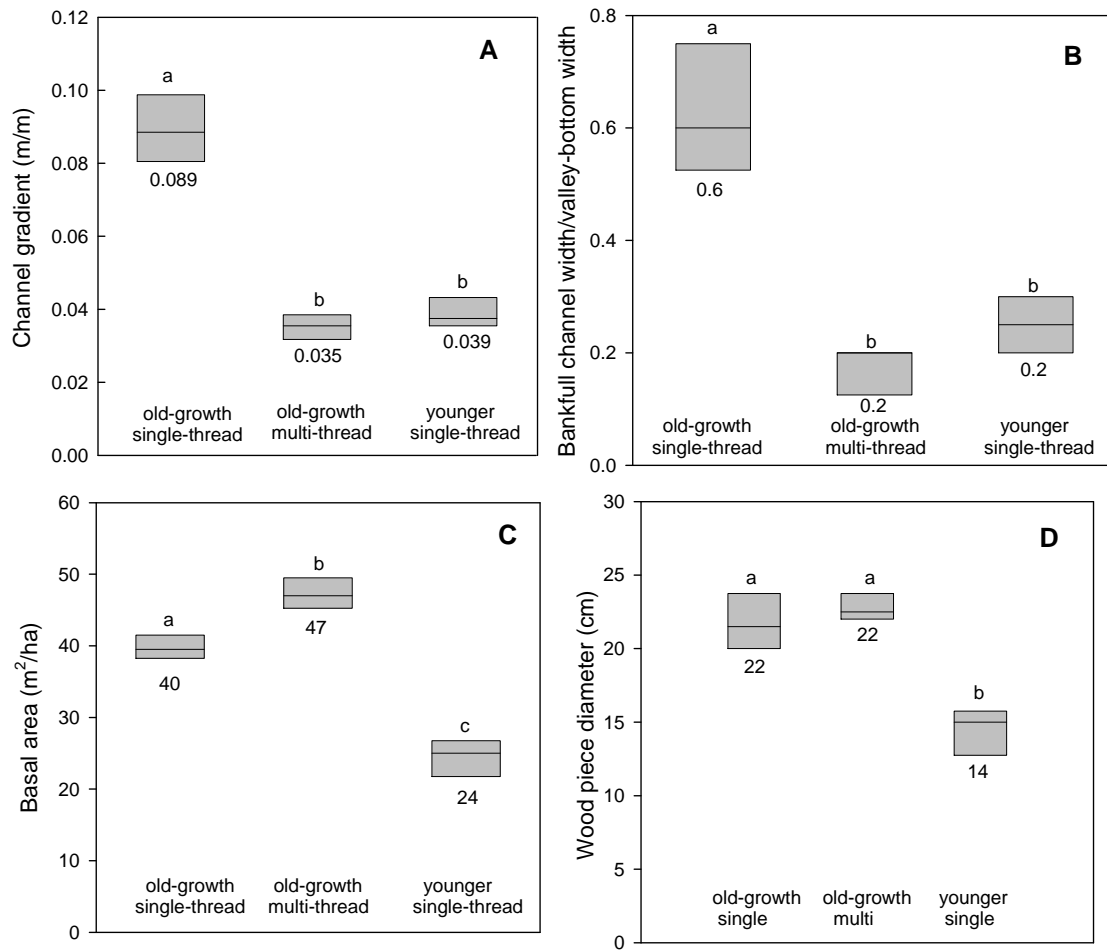

Figure DR2. Box plot of (A) maximum wood piece diameter (B) wood load, and (C) debris roughness for each channel type. The horizontal line within each box indicates the median value, which is also listed beneath the box. Box ends are the 25<sup>th</sup> and 75<sup>th</sup> percentiles. Significant pairwise differences in means are indicated with contrasting letters above each box.

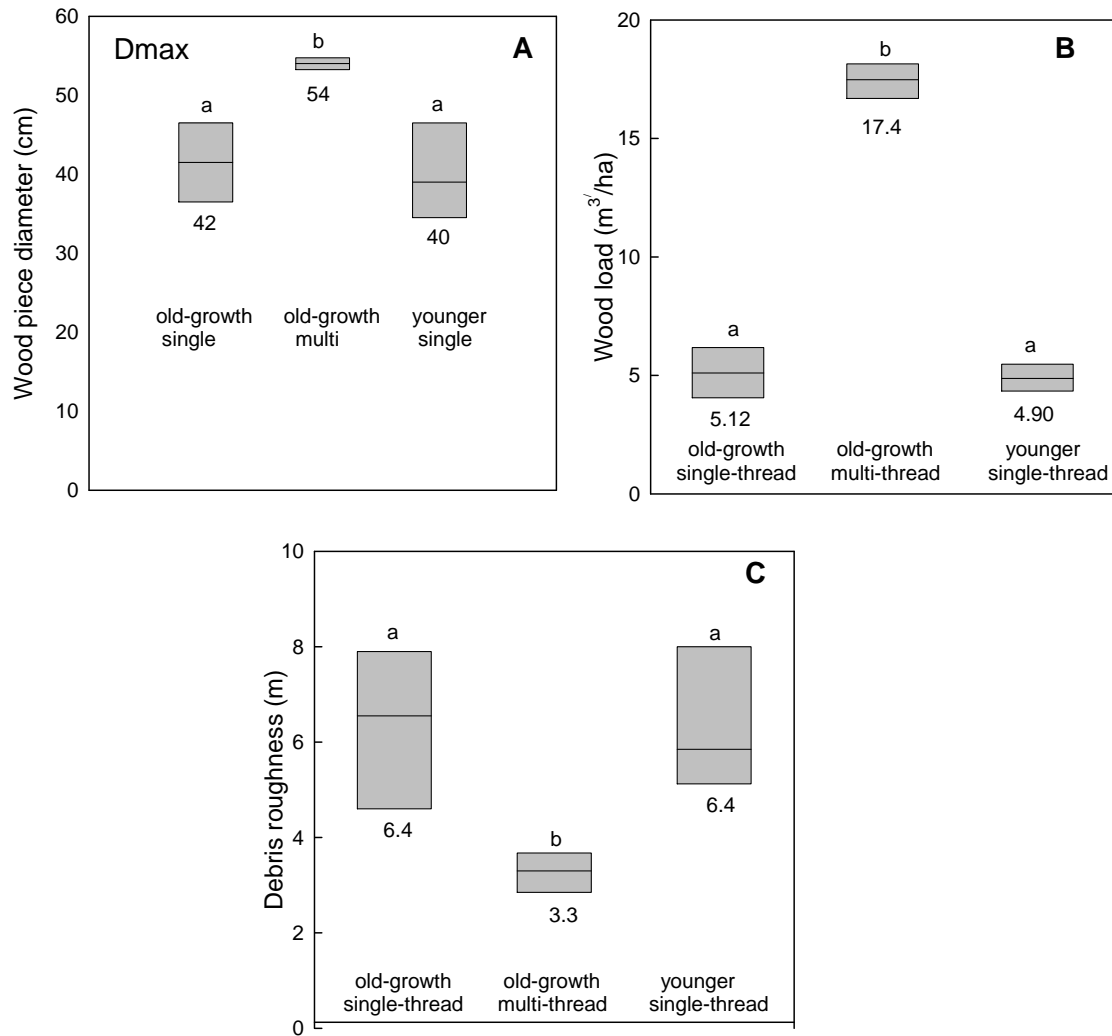

Supplement: Supplementary file 1 [file 23292479]
